# Supplementary material for: An economic evaluation of testing preterm children for the early diagnosis of Cerebral Palsy using Australian Data.
Source: Research Square preprint supplement (doi:10.21203/rs.3.rs-6103920/v1), 2025-03-24
Supplement: Supplementary file 1 [file 2e7353952bea4d7bdfb91752.docx]

An economic evaluation of testing preterm children for the early diagnosis of Cerebral Palsy using Australian Data.

**APPENDIX**

**APPENDIX A - Methods: a simple theoretical framework for the early diagnosis of CP**

This appendix details the theoretical framework that we used to estimate the costs and benefits of early diagnosis of CP and highlights the policy suggestions that can be inferred from it.

The health economics analysis of early diagnosis of CP, at a very high level, can be conceptualised as a *decision problem under uncertainty, with sequential disclosure of information.*

The main source of uncertainty for the clinician is whether the infant, when born, is affected by cerebral palsy (CP). Therefore, a newborn could be in two *health states* (henceforth just *state*)

where stands for CP and when *is not affected by CP*, and the clinician at child’s birth may not know which of the two is the true *state*. Define as

the *prior* probability that an infant is affected by CP. This is the probability before obtaining any kind of additional information on the health of infant. More specifically, this is the probability for a newborn to have CP, at the time when the infant is conceived and pregnancy starts, before any information is collected on his/her health.

Therefore, the prior probability can be estimated from data by the prevalence ratio of CP, in the relevant community, that is by the ratio of infants affected by CP over the number of newborn children in a given period of time. Worldwide such probability is estimated to be about [1].

The main problem for the clinician is to discover as soon as possible the true state of the infant, that is whether is affected by CP. Indeed, an early diagnosis could enhance early treatment and so better lifetime quality of life, for the infant and the supporting family, as compared to later diagnosis. However, early discovery may be more costly than late discovery, at least in the short run, for the National Health System (NHS). It needs well trained clinicians implementing diagnostic tests, as well as equipment such as MRI, which are costly.

This may pose a potential trade-off between improving the quality of life of a person affected by CP and their family, and the higher costs for NHS. Here we discuss the theoretical framework that we used to evaluate this tradeoff.

*Diagnosing Cerebral Palsy*

We conceive the diagnosis of CP as based on two main classes of signals, which we call *early* and *later* signals. We consider the former to be virtually costless and observed at prenatal and perinatal age. The latter are costly and could be observed within the month of life, or later until the infant is years old, as the outcome of some costly diagnostic checks.

*Early signals at prenatal/perinatal age*

During pregnancy, at birth or immediately after birth, the clinician can observe (at no, or negligible, cost) a collection of signals (month of birth, brain encephalopthy by means of ultrasounds) which are related to the state of health .

Suppose is the generic early signal, with . To diagnose CP the *interesting* signals are those *informative* on CP, so called because they are meaningfully correlated with the health state, at least for some of the values that such can take.

As an example, suppose is the month of birth from the beginning of pregnancy. Then the earlier the birth the more likely is CP, that is state . This can be summarised by saying that the *conditional (to having observed ,* or *posterior,* probability of CP, computed by means of the *Bayes* rule, and defined by

increases as decreases. Hence, it is likely that

for very early birth dates, and

as birth approaches months, where as said before, is the so called *prior*, or *marginal*, probability for an infant to be affected by CP. Clearly, the larger are the differences in (2’) and (2’’) between the *posterior* and *prior* probabilities the more informative are the signals.

Expression (2) could be estimated from data by counting how many newborn infants are affected by CP and manifest a given level of , and then dividing this number by the total number of infants who exhibited that level of . More technically, the estimate of the *conditional* (to ) probability of CP can be performed by estimating the *joint* probability of CP and , divided by the estimate of the *marginal, prior,* probability of .

Clearly the computation of expressions such as (2) requires the availability of a reliable data base containing the relevant information, systematically collected and stored. Tables A1-A4 below will discuss numerical examples to illustrate the point.

In analogy with (2), it is also possible to estimate the *Likelihood* function as

that is the *conditional* probability of the signal given the state . That is, how *likely* is to observe the signal when the true (unknown until diagnosis) state of health for the infant is . The *Likelihood function* plays a very important role in statistical inference, where an unknown quantity, parameter, has to be estimated on the basis of the observed data. In particular, the principle of *Maximum LIkelihood* is one of the most widespread methods of estimation, which enjoys a number of interesting estimation features. In our case, on the basis of the observed signals we want to infer whether or not the infant is affected by CP. Indeed, what is unknown in our problem is the newborn state of health, and we use the signals to draw an inference on it.

*Example*

As an illustration of the above definitions, consider the following Table A1 below, summarising a numerical example related to a sample of newborn infants, with of them being affected by CP. That is, in the example the sample of infants is sufficiently large and we assume the CP rate of incidence to be about the one observed for the entire world population, namely Table A1 could be interpreted as a dataset of early signals collected by clinicians over time, and which is used to decide how to proceed with later signals. A data set such as Table A1 should be continuously updated as new information becomes available and the estimates probabilities may change accordingly.

**Table A1: example of a database on early signals informativeness.**

|  |  |  |  |  |  |  |  |
| --- | --- | --- | --- | --- | --- | --- | --- |
|  | 9000 | 2 | 0.45 | 0.0001 | 0.00022 | 0.05 | 0.45 |
|  | 6000 | 4 | 0.3 | 0.0002 | 0.0007 | 0.1 | 0.30 |
|  | 3000 | 6 | 0.15 | 0.0003 | 0.002 | 0.15 | 0.15 |
|  | 1500 | 8 | 0.075 | 0.0004 | 0.005 | 0.2 | 0.075 |
|  | 500 | 20 | 0.025 | 0.001 | 0.04 | 0.5 | 0.024 |
| **Total** | 20000 | 40 | 1 | 0.002 | 0.048 | 1 | 1 |

In Table A1 is the month of birth from the beginning of pregnancy, which can take values with . The symbol , with , stands for the number of infants born at month , is the number of infants born at month affected by CP,

The interpretation of figures in Table A1 is immediate. For example, conditional to having been born at month , the probability for an infant to be affected by CP is , that is twenty times as much as the overall rate of incidence in the population. Furthermore, the likelihood function suggests that conditional to being affected by CP it is , that is one out of two infants with CP are born at the month of pregnancy.

Finally notice that when and viceversa. That is, whenever the value of implies a conditional probability above the population incidence rate of CP, it becomes more likely that signal is generated by a bad state than by a good state and viceversa.

Therefore, rather importantly, screening with later signals those infants for whom the inequality is satisfied corresponds to following the *Maximum Likelihood* Principle.

To summarise, Table A1 is a simple example of a database that can be used to decide how to proceed with later diagnostic checks. If the criterion to further investigate a newborn child is when the early signals are such that then the example suggests that a share equal to , that is of newborn infants, will be further screened and later signals acquired.

The above reasoning can be extended to all meaningful early signals , with , available at prenatal or perinatal age, estimating the conditional (to all ) probability of CP as follows

the computation of which would require counting how many infants exhibit CP, jointly with the early signals values.

We illustrate, with a numerical example, how to compute the conditional probabilities with two signals: month of birth from the beginning of pregnancy and , the response of an ultrasound brain test taken during pregnancy. For the sake of illustration, suppose the ultrasound response takes as values , with where is normal brain and stands for very serious brain damage. Consider the same sample of infants as in Table A1, where we now indicate with and , respectively, the number of infants born at month with ultrasound index , and the subgroup of those with CP. We can then construct the following Table A, where the content in the cells is as follows. For example, on the top left corner of the Table, at the junction between and , the notation , stands for 0 infants born at the ninth month of pregnancy with completely normal brain, and infants with CP. At the junction between and the notation stands for infants born at the 5th month of pregnancy, with ultrasound index equal to , of which infants affected by CP. The interpretation of the remaining cells is analogous.

**Table A2: Diagnosis precision with joint signals.**

|  |  | | | | |
| --- | --- | --- | --- | --- | --- |
|  |  | **1** | **2** | **3** | **Total** |
| **9** | 5800/0 | 2000/0 | 1200/2 | 9000/2 |
| **8** | 3000/0 | 2000/1 | 1000/3 | 6000/4 |
| **7** | 2000/1 | 600/2 | 400/3 | 3000/6 |
| **6** | 1100/1 | 200/2 | 200/5 | 1500/8 |
| **5** | 100/2 | 200/3 | 200/15 | 500/20 |
| **Total** | 12000/4 | 5000/8 | 3000/28 | 20000/40 |

Table A2 suggests how the diagnosis precision, namely the conditional probability of CP given the signals, may increase when considering and jointly with respect to when they are taken separately. This can be seen in Table A3 below, where the generic cell contains the following conditional probability

**Table A3: conditional probabilities of CP with two signals.**

|  |  | | | | |
| --- | --- | --- | --- | --- | --- |
|  |  | **1** | **2** | **3** | **Total** |
| **9** | 0 | 0 | 0.0017 | 0.00022 |
| **8** | 0 | 0.0005 | 0.003 | 0.0007 |
| **7** | 0.0005 | 0.0033 | 0.0075 | 0.002 |
| **6** | 0.0009 | 0.01 | 0.025 | 0.005 |
| **5** | 0.02 | 0.015 | 0.075 | 0.04 |
| **Total** | 0.0003 | 0.0016 | 0.009 |  |

That is, the probability for an infant to be affected by CP given the joint signal . Consider for example the combination. In Table A3 the conditional probability of CP is , much higher than which obtains when only is considered, and also much higher than , when only is considered. Furthermore, this is much higher than which is the population incidence rate of CP, *prior probability*, on newborn infants.

If, as for Table A1, also with A3 we take as cut-off probability to decide which newborn infants should be further investigated, for a possible timely diagnosis of CP, then the additional screening will be made for most signals combinations. Joint signals with positive entries which will not lead to additional screening are for , ,, .

As a consequence, with two signals only infants with CP, on average, will not be screened for a timely diagnosis since, overall, children will now be screened with two signals, rather than , as with only one signal.

In analogy with Table A1, it is also interesting to compute the signals likelihood, given that the infant is affected by CP. The following Table A4 contains the likelihood of any combination of signals, conditional on CP.

**Table A4: Likelihood of signals.**

|  |  | | | | |
| --- | --- | --- | --- | --- | --- |
|  |  | **1** | **2** | **3** | **Total** |
| **9** | 0 | 0 | 0.05 | 0.05 |
| **8** | 0 | 0.025 | 0.075 | 0.1 |
| **7** | 0.025 | 0.05 | 0.075 | 0.15 |
| **6** | 0.025 | 0.05 | 0.125 | 0.2 |
| **5** | 0.05 | 0.075 | 0.375 | 0.5 |
| **Total** | 0.1 | 0.2 | 0.7 | 1 |

The interpretation of the cells content is the same as in Table A1. For example, conditional on an infant being affected by CP the signal combination shows up with probability while signal manifests itself with probability . That is, in this numerical example, out of infants affected by CP exhibit the signal .

Likewise, the likelihood of signals combination, conditional on a good state of health, is given by

For example, conditional to an infant being healthy, the signal combination will have a *likelihood* to appear equal to

that is much lower than when the infant is affected by CP. Analogously, the likelihood of on the whole is approximately, , again much lower than , which obtains when the infant suffers for CP.

In our numerical example, this is showing that age at birth and ultrasound are very informative signals for CP, because they become more(less) likely with(without) CP than without(with) CP.

| ***Health Policy Suggestion***  *For a timely diagnosis of CP, the informative early signals should be systematically recorded and stored, for each newborn infant, to build data sets such as Tables A1-A4. The data set should be readily updated as additional information becomes available.* |
| --- |

*Later signals; diagnostic checks within 6 months from birth*

After the observation of an infant early signals, the following decision rule may be implemented:

If

where is a threshold value for the conditional probability of CP, then diagnostic checks would be performed before months of life. In the previous example we assumed to be

That is, the prevailing incidence rate in the whole population could be used as a critical threshold for proceeding with diagnostic checks based on later signals. However, Health Authorities could decide to adopt a more precautionary strategy, fixing a lower threshold, or may opt for a less precautionary strategy with a higher threshold.

In the model we assume that the timing of the later diagnostic checks, within the first months of life, may be important and for this reason we introduce explicitly in the model the precise timing of checks. That is, we suppose that providing a diagnosis at the month may have different quality of life and costs implications than having the diagnosis at the or month. In any case, the model will be sufficiently general to encompass also the possibility that it won’t matter when, within the first months of an infant life, the CP diagnosis is made.

Define now as the number of newborn infants with early signals satisfying (4), which is also the number of infants who will undertake later diagnostic checks. The outcome of such diagnostic checks provides later signals , with .

Proceeding in analogy with Section 2.1 if

then implement the set of therapies for treating CP. Fixing the value of the threshold probability is perhaps less obvious than , which could refer directly to the population incidence rate. For this reason, will be fixed by clinicians on the basis of their experience and competence. Finally, let be the number of infants satisfying (5), who will then be the number of newborn receiving a treatment for CP immediately, from within the first months of their life onward.

*The population of infants*

The number of infants, born in a time unit, , could be subdivided into subpopulations, depending on the signals and their health state. This partitioning will be useful in the rest of the analysis when computing costs and quality-of-life/utilities

The first subdivision concerns the following two subpopulations:

where is the number of those infants satisfying (4) and the number of infants who do not satisfy (4). For example, with reference to Table A1, using as cut-off probability for additional screening the value , then and .

Therefore, if Table A1 represents a stationary situation and it follows that and . Out of there will be children affected by CP, of whom will be in the set of children screened with later signals. As a consequence, infants affected by CP will not be screened with later signals and their treatment deferred until about months after their birth.

However, since there could be false positives/negatives, in turn and can be further subdivided as

where is the number of those satisfying (4) and are affected by CP, the number of those who do not satisfy (4) and are not affected by CP, the number of those who do not satisfy (4) and are affected by CP and the number of infants who do not satisfy (4) and are not affected by CP.

Hence

where is the number of *false positives* while the number of *false negatives*, *induced by early signals*. It follows that

;

Of course, if then , which means that early signals are perfectly screening infants, with and without CP. The example we built in Table A1 does not satisfy so, since .

By an analogous reasoning, considering now also later signals, that is diagnostic checks before the month of life, the number of newborn children can be written as

where subscript stands for infants tested with diagnostic checks and satisfying (5) and stands for infants tested with diagnostic checks and not satisfying (5).

Therefore, is the number of *false positives*, and the *number of false negatives, induced by later signals*

*The costs for the Health Care System*

Associated to a *single infant* state of health there are costs , expressed in *present value terms at birth*, which NHS has to pay to perform diagnostic checks, treat and support the individual, sustain his/her family and others. There could also be private costs supported directly by the family which here we disregard focusing only on NHS costs.

where typically are both larger than . The costs of treatment will also include possible costs for family support. More explicitly, are the initial costs paid for an early treatment due to a false positive of a diagnostic check within months from birth. After few months the infant will reveal to be non-affected by CP and the treatment terminated.

If the total cost (11) is subdivided in categories, each category in turn can be brokedown into sub-categories. More specifically if , with , is the cost to observe the later signal , then

Since later signals are observed within six months from birth, their actual costs could be considered as coinciding with their present value and do not need to be *discounted* to the birth date.

In the example in the previous section based on Table A1, where , the total cost for screeening with later signals will be .

Furthermore, if is the cost of treatment at month , with and , the expected lifetime of an infant affected by CP, is the discount factor, and the interest rate prevailing at birth in the market, then

Likewise if the infant is not affected by CP, but (4) and (5) are satisfied, and if is the cost of treatment at month with and , assuming that months from birth is when the treatment will be stopped, it follows

Finally, if the child is affected by CP but the treatment starts at month , and if is the cost of treatment at time *,* with, then the cost for treatment will be

Therefore, at birth, the *present value* of the total costs for the NHS, related to CP, is

Since

it follows that can be alternatively expressed as

and so as

For given costs, the choice variables in (18) are and , whose values in turn may affect , , and . Notice that choosing means fixing the threshold level in (4) while choosing amounts to fix the threshold level in (5). Therefore, for example, if and were selected to minimize (18) then careful consideration on costs, but also of the consequences on , , and , would be required.

**References**

1. Novak I, Morgan C, Adde L, Blackman J, Boyd RN, Brunstrom-Hernandez J et al. Early, Accurate Diagnosis and Early Intervention in Cerebral Palsy: Advances in Diagnosis and Treatment. JAMA Pediatr. 2017 Sep 1;171(9):897-907. doi: 10.1001/jamapediatrics.2017.1689. Erratum in: JAMA Pediatr. 2017 Sep 1;171(9):919. doi: 10.1001/jamapediatrics.2017.3169. PMID: 28715518; PMCID: PMC9641643.
